# Supplementary material
Source: MDPI journal article supplement (https://www.mdpi.com/2673-8007/4/2/47)
Supplement: s1 [file s1]

## Supplementary Table S1 – Historical Data

| Site | Chemical<br>Oxygen<br>Demand<br>(COD)<br>(mg/L) | Biochemical<br>Oxygen<br>Demand<br>(BOD-5<br>Day)<br>(mg/L) | Phosphorus<br>(mg/L) | pH            | Ammonia<br>(as N)<br>(mg/L) | Total Kjeldahl<br>Nitrogen (as<br>N)<br>(mg/L) | Total<br>Nitrogen (as<br>N)<br>(mg/L) | Sulphid<br>e (as S)<br>(mg/L) | Total<br>Oxidised<br>Sulphur (as<br>S)<br>(mg/L) | Sodium<br>(mg/L)  | Chloride<br>(mg/L)  | Iron<br>(mg/L)  | Seleni<br>um<br>(mg/L) | Ethanol<br>(mg/L) | Oil &<br>Grease<br>(HEM)<br>(mg/L) | Total<br>Dissolved<br>Solids<br>(mg/L) | Temperature<br>(° C) |
|------|-------------------------------------------------|-------------------------------------------------------------|----------------------|---------------|-----------------------------|------------------------------------------------|---------------------------------------|-------------------------------|--------------------------------------------------|-------------------|---------------------|-----------------|------------------------|-------------------|------------------------------------|----------------------------------------|----------------------|
| 1    | 1232<br>±446.23                                 | 656.32<br>±326.3                                            | 26.5<br>±20.37       | 6.36<br>±0.35 | 32.97<br>±72.91             | 38.66<br>±24.67                                | 20.11<br>±18.31                       | 1<br>±1.59                    | 294<br>±121.57                                   | 740<br>±220.91    | 332<br>±138.09      | 0.74<br>±0.15   | 0.05<br>±0             | 3.5<br>±1.1       | 138.85<br>±139.68                  | 2578.95<br>±732.26                     | 32.26<br>±1.3        |
| 2    | 7133.33<br>±1457.17                             | 2908.24<br>±1469.13                                         |                      | 8.71<br>±1.14 | 2.86<br>±2.36               | 71.85<br>±33.05                                | 73.42<br>±34.12                       | 0.4<br>±0.33                  | 75.5<br>±26.16                                   | 609.33<br>±362.43 | 59.5<br>±13.44      | 1.07<br>±0.66   | 0.04<br>±0.02          | 1761.58<br>±820.9 |                                    | 3019.35<br>±1467.29                    | 28.31<br>±4.33       |
| 3    | 2700<br>±1838.48                                | 2520<br>±1630.96                                            |                      | 9.55<br>±0.47 | 2.18<br>±1.25               | 58.65<br>±35.95                                | 67.56<br>±51.49                       | 0.1<br>±0                     | 230<br>±56.57                                    | 138<br>±224.79    | 30<br>±12.73        | 1.25<br>±0.72   | 0.04<br>±0.02          | 10.89<br>±17.41   | 957.5<br>±492.37                   | 2419.57<br>±1344.07                    | 25.38<br>±4.74       |
| 4    | 41<br>±22.63                                    | 17.95<br>±27.53                                             |                      | 7.13<br>±0.42 | 0.4<br>±0.39                | 1.78<br>±0.8                                   | 2.55<br>±1.1                          | 0.1<br>±0                     | 8.45<br>±0.92                                    | 63.36<br>±29.64   | 88<br>±31.11        | 0.81<br>±0.56   | 0.05<br>±0             | 5*<br>±8.75       | 14.25<br>±8.75                     | 284.55<br>±115.79                      | 19.5<br>±0.71        |
| 5    | 4150<br>±1484.92                                | 4140<br>±1813.28                                            |                      | 6.37<br>±0.29 | 27.67<br>±13.37             | 232<br>±67.6                                   |                                       | 0.63<br>±0.52                 |                                                  | 351.67<br>±178.6  |                     | 25<br>±42.44    | 0.05<br>±0             |                   | 715.33<br>±938.7                   | 1933.33<br>±378.59                     | 26.83<br>±3.42       |
| 7    | 3900*<br>±1154.7                                | 10666.67<br>±1154.7                                         |                      | 7.19<br>±0.2  | 90.33<br>±52.73             | 366.67<br>±115.04                              | 595.33<br>±269.32                     | 0.1<br>±0                     | 1050<br>±376.39                                  | 110000<br>±10000  | 230000<br>±52915.03 | 68.33<br>±37.87 | 0.05<br>±0             |                   | 104.33<br>±100.27                  | 313333.33<br>±15275.25                 | 18.8<br>±2.08        |
| 8    | 5600<br>±916.52                                 | 3714<br>±3201.82                                            |                      | 7.52<br>±0.54 | 0.96<br>±1.53               | 4.8<br>±2.83                                   |                                       | 0.24<br>±0.3                  | 48.7<br>±42.82                                   | 410<br>±235.16    |                     | 1.64<br>±0.71   | 0.03<br>±0.03          | 15.17<br>±17.48   | 623<br>±400.36                     | 3175<br>±2593.09                       | 16.3<br>±1.96        |
| 9    | 2100.67<br>±1106.87                             | 1087.33<br>±649.91                                          |                      | 8.2<br>±0.9   | 4.87<br>±3.87               | 32.48<br>±24.84                                | 28.57<br>±24.02                       | 0.12<br>±0.04                 | 94.31<br>±69.33                                  | 235.06<br>±207.13 | 285.5<br>±306.2     | 1.44<br>±2.33   | 0.05<br>±0             | 280<br>±248.11    | 44.54<br>±51.41                    | 1311.22<br>±864.19                     | 30.6<br>±3.66        |
| 10   | 2850<br>±1202.08                                | 1066.83<br>±924                                             |                      | 7.19<br>±0.44 | 3.68<br>±4.18               | 7.26<br>±3.56                                  |                                       | 0.13<br>±0.05                 | 30.17<br>±8.3                                    |                   |                     |                 |                        | 94.67<br>±120.7   | 219.33<br>±280.43                  | 522.5<br>±283.45                       | 17.68<br>±1.9        |
| 11   | 81.25<br>±43.36                                 | 29<br>±21.05                                                | 0.22*                | 7.81<br>±0.76 | 1.25<br>±0.66               | 7.23<br>±3.64                                  |                                       | 0.11<br>±0.03                 | 41.75<br>±38.91                                  | 247.89<br>±78.32  | 16.25<br>±5.68      | 0.45<br>±0.18   | 0.04<br>±0.02          |                   | 18.25<br>±11.27                    | 818.33<br>±246.08                      | 26.07<br>±3.17       |
| 12   | 450*<br>±242.19                                 | 359.4<br>±242.19                                            |                      | 6.57<br>±0.38 | 75.2<br>±26.54              | 95.44<br>±35.98                                | 97.06<br>±37.49                       | 0.14<br>±0.05                 | 223.8<br>±91.69                                  | 99*<br>±91.69     | 150*<br>±91.69      | 6.5*<br>±91.69  |                        |                   | 10.25<br>±9.22                     | 741.92<br>±156.83                      | 26.15<br>±1.63       |

historical data mean ± SD. \* denotes no SD available due to single sample
